# Supplementary material for: Microglia and complement mediate early corticostriatal synapse loss and cognitive dysfunction in Huntington’s disease
Source: PubMed Central journal article supplement (PMC10667107; doi:10.1038/s41591-023-02566-3), 2023-10-09
Supplement: 41591_2023_2566_MOESM1_ESM.pdf [file 41591_2023_2566_MOESM1_ESM.pdf]

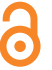

---

# Microglia and complement mediate early corticostriatal synapse loss and cognitive dysfunction in Huntington's disease

---

In the format provided by the authors and unedited

---

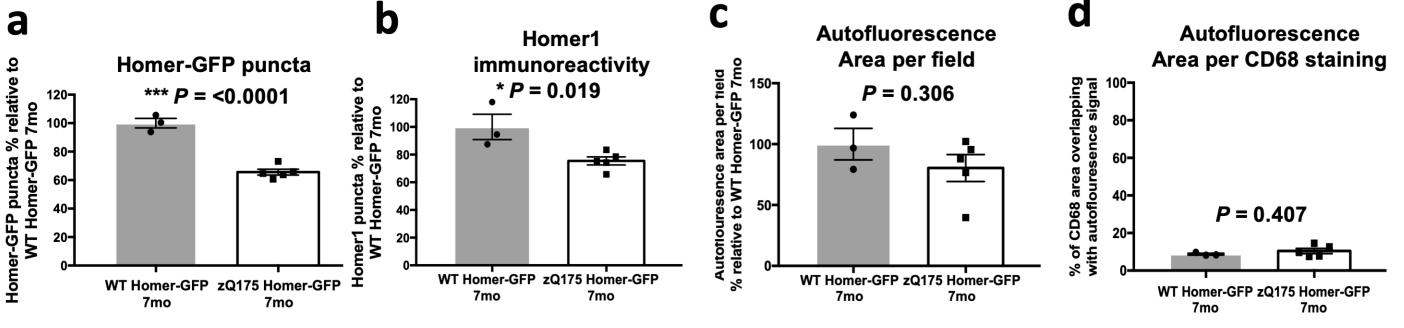

**e** zQ175 4mo injected with AAV1/2 GFP

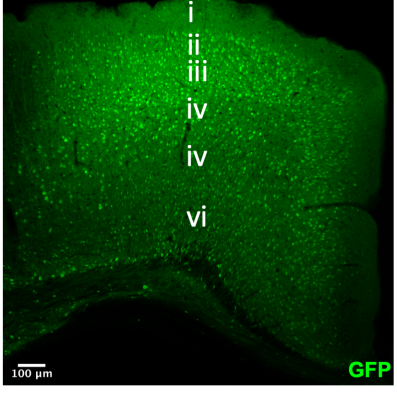

**f** Layer iii motor cortex of zQ175 4mo injected with AAV1/2 GFP

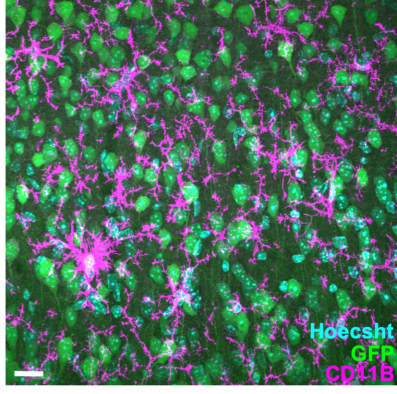

**g** BR mice (striatal neuron mHtt ablation) Rgs9-Cre mediated deletion    BE mice (cortical neuron mHtt ablation) Emx1-Cre mediated deletion    BER mice (cortical and striatal mHtt ablation) Rgs9 and Emx1-Cre mediated deletion

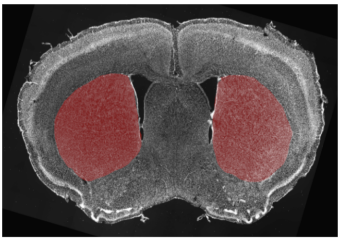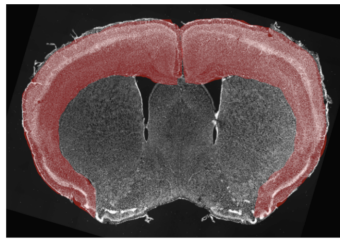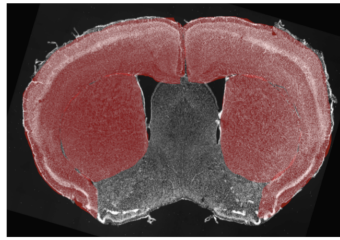

Brain regions where neuronal mHtt is ablated

**Supplemental data figure 1: (a,b)** Bar charts showing the percentage of Homer-GFP puncta **(a)** and the percentage of Homer1 immunoreactive puncta **(b)** in 7 mo zQ175 Homer-GFP mice relative to that seen in 7 mo WT Homer-GFP littermates, n=3 WT Homer-GFP and 5 zQ175 Homer-GFP mice (2F and 1M for WT Homer-GFP and 3F and 2M for zQ175 Homer-GFP). Unpaired t-test, for Homer-GFP puncta  $p < 0.0001$ ; for Homer1 immunoreactivity  $p = 0.019$ . **(c)** Bar chart showing the relative % area per field occupied by auto-fluorescent signal in 7 mo zQ175 Homer-GFP mice relative to that seen in 7 mo WT Homer-GFP littermates, n=3 WT Homer-GFP and 5 zQ175 Homer-GFP mice (2F and 1M for WT Homer-GFP and 3F and 2M for zQ175 Homer-GFP). Unpaired t-test  $p = 0.306$ . **(d)** Bar chart showing the % of CD68 area overlapping with autofluorescent signal in 7 mo zQ175 Homer-GFP mice and WT Homer-GFP littermates, n=3 WT Homer-GFP and 5 zQ175 Homer-GFP mice (2F and 1M for WT Homer-GFP and 3F and 2M for zQ175 Homer-GFP). Unpaired t-test  $p = 0.407$ . **(e)** Representative 10x confocal image of the motor cortex of a 4 mo zQ175 mouse injected with pAAV2-hsyn-EGFP showing the distribution of transduced cells in different cortical layers. Scale bar = 100  $\mu\text{m}$ . **(f)** Representative 60x confocal image of layer iii of the motor cortex of a 4 mo zQ175 mice injected with pAAV2-hsyn-EGFP showing transduced cells and microglia denoted by CD11B staining. Scale bar = 10  $\mu\text{m}$ . **(g)** Coronal section of a mouse brain showing the brain regions (highlighted in red) in which *mHtt* has been genetically removed from selected neuronal populations in BR (RGS-9 cre to excise *mHtt* in striatal neurons) BE (Emx-1 cre to excise *mHtt* in cortical neurons) and BER (Rgs-9 and Emx-1 cre to excise *mHtt* in both striatal and cortical neurons) mice. For bar charts, bars depict the mean. All error bars represent SEM. Stars depict level of significance with  $* = p < 0.05$ ,  $** = p < 0.01$  and  $*** = p < 0.0001$ .

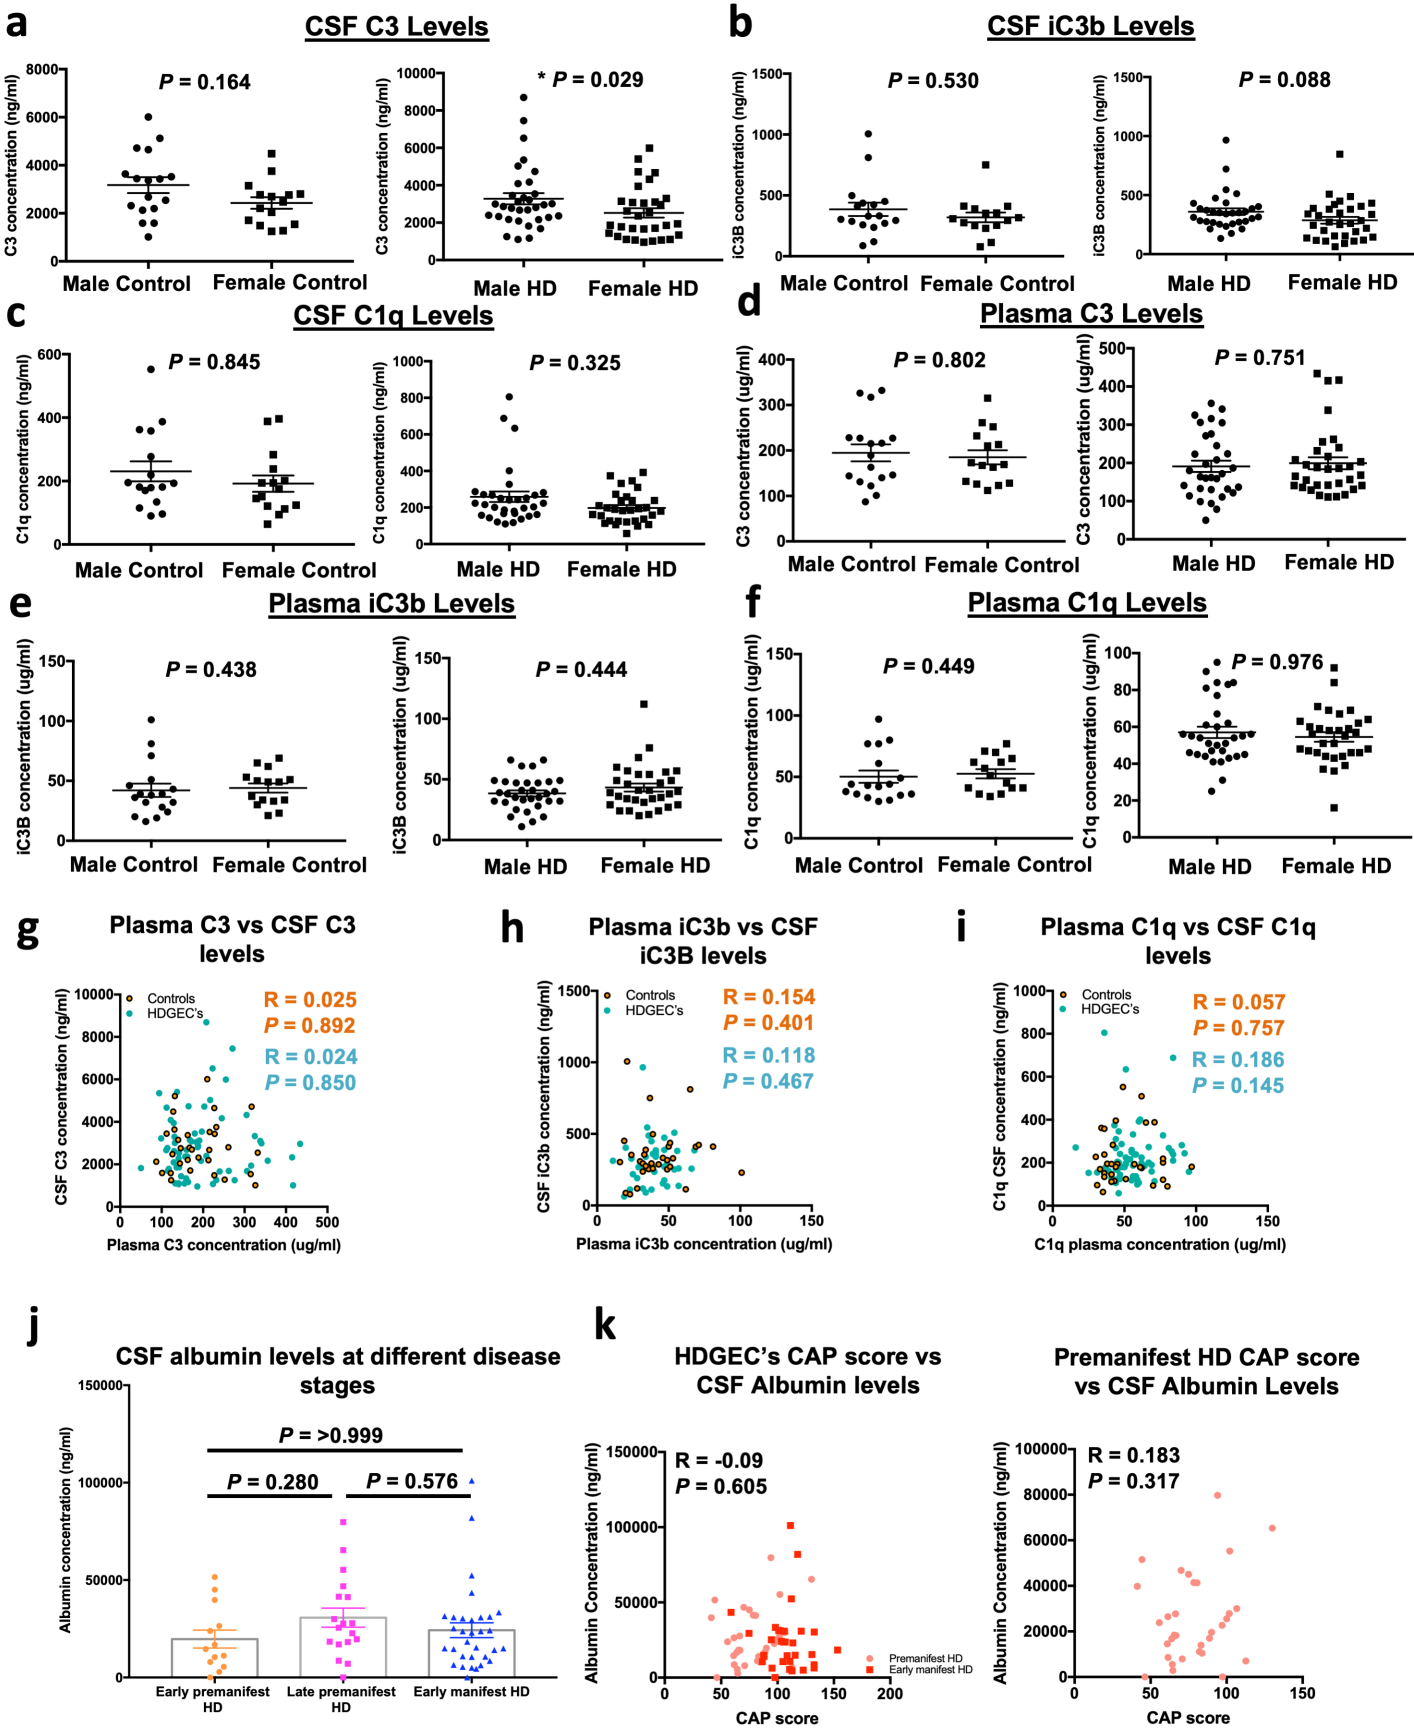

**Supplementary data figure 2:** (a) Graphs showing the C3 concentration in CSF samples from males and females in the control (clinically normal) group and in CSF samples from males and females with HD (both premanifest and manifest (HDGEC's)). Each dot represents a sample from a separate individual and the line denotes the mean; for the controls n=17 males and 15 females, in the HD samples n=32 males and 31 females. Kolmogorov-Smirnov test p=0.164 for the controls and p=0.029 for the HDGEC's. (b) Graphs showing the iC3b concentration in CSF samples from males and females in the control (clinically normal) group and in CSF samples from males and females with HD (both premanifest and manifest (HDGEC's)). Each dot represents a sample from a separate individual and the line denotes the mean; for the controls n=17 males and 15 females, in the HD samples n=32 males and 31 females. Kolmogorov-Smirnov test p=0.530 for the controls and p=0.088 for the HDGEC's. (c) Graphs showing the C1q concentration in CSF samples from males and females in the control (clinically normal) group and in CSF samples from males and females with HD (both premanifest and manifest (HDGEC's)). Each dot represents a sample from a separate individual and the line denotes the mean; for the controls n=17 males and 15 females, in the HD samples n=32 males and 31 females. Kolmogorov-Smirnov test p=0.845 for the controls and p=0.325 for the HDGEC's. (d) Graphs showing the C3 concentration in plasma samples from males and females in the control (clinically normal) group and in CSF samples from males and females with HD (both premanifest and manifest (HDGEC's)). Each dot represents a sample from a separate individual and the line denotes the mean; for the controls n=17 males and 15 females, in the HD samples n=33 males and 31 females. Kolmogorov-Smirnov test p=0.802 for the controls and p=0.751 for the HDGEC's. (e) Graphs showing the iC3b concentration in plasma samples from males and females in the control (clinically normal) group and in CSF samples from males and females with HD (both premanifest and manifest (HDGEC's)). Each dot represents a sample from a separate individual and the line denotes the mean; for the controls n=17 males and 15 females, in the HD samples n=33 males and 31 females. Kolmogorov-Smirnov test p=0.438 for the controls and p=0.444 for the HDGEC's. (f) Graphs showing the C1q concentration in plasma samples from males and females in the control (clinically normal) group and in CSF samples from males and females with HD (both premanifest and manifest (HDGEC's)). Each dot represents a sample from a separate individual and the line denotes the mean; for the controls n=17 males and 15 females, in the HD samples n=33 males and 31 females. Kolmogorov-Smirnov test p=0.449 for the controls and p=0.976 for the HDGEC's. (g) Graph showing the association between plasma C3 concentration and CSF C3 concentration in samples from Huntington's Disease gene expansion carriers (HDGECs) as well as those from control (clinically normal) individuals recruited into the HDClarity study. Each dot represents a sample from a separate

individual, n=63 HDGEC's and n=32 controls. Spearman r for HDGEC's  $p=0.850$ ; for controls  $p=0.892$ . **(h)** Graph showing the association between plasma iC3b concentration and CSF iC3b concentration in samples from Huntington's Disease gene expansion carriers (HDGECs) as well as those from control (clinically normal) individuals recruited into the HDClarity study. Each dot represents a sample from a separate individual, n=63 HDGEC's and n=32 controls. Spearman r for HDGEC's  $p=0.467$ ; for controls  $p=0.401$ . **(i)** Graph showing the association between Plasma C1q concentration and CSF C1q concentration in samples from Huntington's Disease gene expansion carriers (HDGECs) as well as those from control (clinically normal) individuals recruited into the HDClarity study. Each dot represents a sample from a separate individual, n=63 HDGEC's and n=32 controls. Spearman r for HDGEC's  $p=0.145$ ; for controls  $p=0.757$ . **(j)** Bar chart showing the concentration of albumin in CSF samples from early premanifest HD patients (see methods for inclusion criteria), late premanifest HD patients (see methods for inclusion criteria) and early manifest HD patients (see methods for inclusion criteria) recruited into the HDClarity study. Each dot represents a sample from a separate individual and the bar denotes the mean for each group n=13 early premanifest HD, n=18 late premanifest HD and n=32 early manifest HD. Kurkasl-Wallis test (non-parametric ANOVA)  $p=0.215$  with early premanifest versus late premanifest HD  $p=0.280$ , late premanifest versus early manifest HD  $p=0.576$  and early premanifest versus early manifest HD  $p=>0.999$  via Dunn's multiple comparison test. **(k)** Graphs showing the association between CAP score and CSF albumin concentration for all samples from Huntington's Disease gene expansion carriers (HDGECs) as well as those just from premanifest HD patients recruited into the HDClarity study. Each dot represents a sample from a separate individual n=63 HDGEC's and n=31 premanifest HD. Spearman r for HDGEC's  $p=0.605$ ; for premanifest HD  $p=0.317$ . For bar charts and dot plots, bars and lines depict the mean. All error bars represent SEM. Stars depict level of significance with  $*=p<0.05$ ,  $**p<0.01$  and  $***p<0.0001$ .

**a** U of W samples Premanifest HD  
CAP score vs CSF C3 Levels

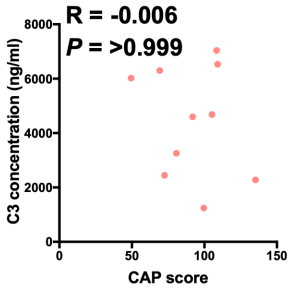

**b** U of W samples Premanifest HD  
CAP score vs CSF iC3b Levels

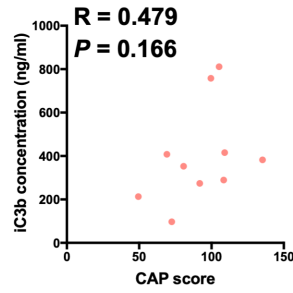

**c** U of W samples Premanifest HD  
CAP score vs CSF C1q Levels

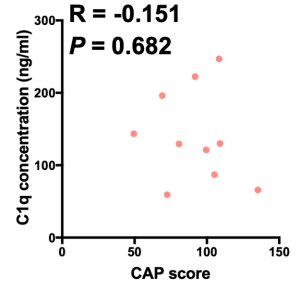

**d** U of W samples Controls CAP score  
vs CSF C3 Levels

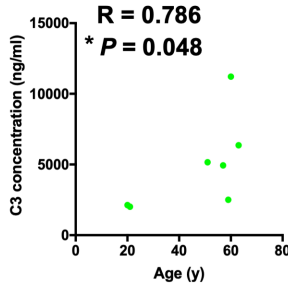

**e** U of W samples Controls CAP score  
vs CSF iC3b Levels

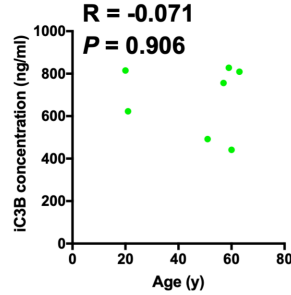

**f** U of W samples Controls CAP score  
vs CSF C1q Levels

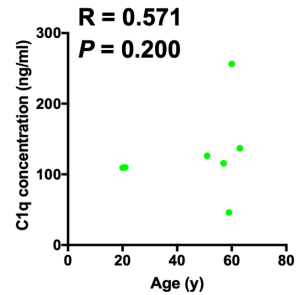

**g** U of W samples CSF C3 Levels:  
Longitudinal measurements from 3  
premanifest HD patients

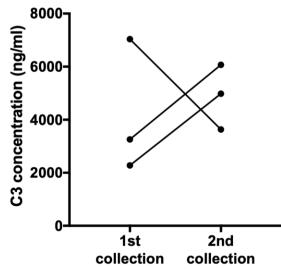

**h** U of W samples CSF iC3b Levels:  
Longitudinal measurements from 3  
premanifest HD patients

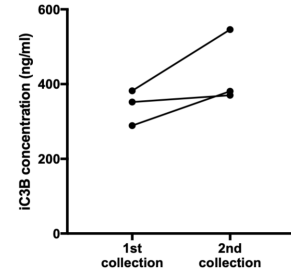

**i** U of W samples CSF C1q Levels:  
Longitudinal measurements from 3  
premanifest HD patients

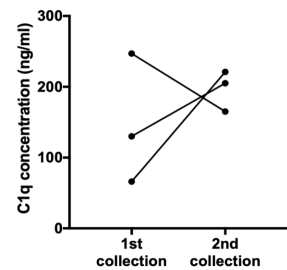

**j** U of W samples Premanifest HD  
CAP score vs CSF Albumin Levels

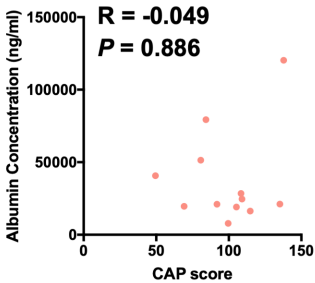

**Supplementary data figure 3:** (a) Graph showing the association between CAP score and CSF C3 concentration in samples from premanifest HD patients recruited into the University of Washington study. Each dot represents a sample from a separate individual n=10 Spearman  $r$   $p > 0.999$ . (b) Graph showing the association between CAP score and CSF iC3b concentration in samples from premanifest HD patients recruited into the University of Washington study. Each dot represents a sample from a separate individual n=10 Spearman  $r$   $p = 0.166$ . (c) Graph showing the association between CAP score and CSF C1q concentration in samples from premanifest HD patients recruited into the University of Washington study. Each dot represents a sample from a separate individual n=10 Spearman  $r$   $p = 0.682$ . (d) Graph showing the association between patient age and CSF C3 concentration in samples from control (clinically normal) individuals recruited into the University of Washington study. Each dot represents a sample from a separate individual n=7 Spearman  $r$   $p = 0.048$ . (e) Graph showing the association between patient age and CSF iC3b concentration in samples from control (clinically normal) individuals recruited into the University of Washington study. Each dot represents a sample from a separate individual n=7 Spearman  $r$   $p = 0.906$ . (f) Graph showing the association between patient age and CSF C1q concentration in samples from control (clinically normal) individuals recruited into the University of Washington study. Each dot represents a sample from a separate individual n=7 Spearman  $r$   $p = 0.200$ . (g) Graph showing CSF C3 concentrations in samples from 3 premanifest HD patients from the University of Washington cohort that underwent a 2<sup>nd</sup> lumbar puncture approximately 1.5yr after the 1<sup>st</sup> sampling (see methods) n=3. (h) Graph showing CSF iC3b concentrations in samples from 3 premanifest HD patients from the University of Washington cohort that underwent a 2<sup>nd</sup> lumbar puncture approximately 1.5yr after the 1<sup>st</sup> sampling (see methods) n=3. (i) Graph showing CSF C1q concentrations in samples from 3 premanifest HD patients from the University of Washington cohort that underwent a 2<sup>nd</sup> lumbar puncture approximately 1.5yr after the 1<sup>st</sup> sampling (see methods) n=3. (j) Graph showing the association between CAP score and CSF albumin concentration for all premanifest samples from the University of Washington. Each dot represents a sample from a separate individual n=12 (this includes the 2<sup>nd</sup> collection samples referenced in panels g,h and i and excludes one sample employed in a, b and c which had a CAP score of 73, and was unfortunately no longer available). Spearman  $r$   $p = 0.886$ . Stars depict level of significance with \* $p < 0.05$ , \*\* $p < 0.01$  and \*\*\* $p < 0.0001$



**Supplemental Table 1**

| <b>Study cohort</b> | <b>Sample ID</b> | <b>Sex</b> | <b>Age</b> | <b>HD Category</b>    | <b>CAG high</b> | <b>CAG low</b> |
|---------------------|------------------|------------|------------|-----------------------|-----------------|----------------|
| HDClarity           | EMHD1            | male       | 54.4       | early HD              | 43              | 17             |
| HDClarity           | EMHD2            | female     | 50.5       | early HD              | 43              | 17             |
| HDClarity           | EMHD3            | female     | 60.3       | early HD              | 39              | 15             |
| HDClarity           | EMHD4            | male       | 69         | early HD              | 41              | 15             |
| HDClarity           | EMHD5            | male       | 39         | early HD              | 42              | 18             |
| HDClarity           | EMHD6            | female     | 52.3       | early HD              | 43              | 10             |
| HDClarity           | EMHD7            | male       | 55.8       | early HD              | 43              | 17             |
| HDClarity           | EMHD8            | male       | 63.9       | early HD              | 43              | 23             |
| HDClarity           | EMHD9            | male       | 42.3       | early HD              | 44              | 25             |
| HDClarity           | EMHD10           | female     | 58.5       | early HD              | 44              | 23             |
| HDClarity           | EMHD11           | female     | 58.6       | early HD              | 42              | 19             |
| HDClarity           | EMHD12           | male       | 50.9       | early HD              | 44              | 17             |
| HDClarity           | EMHD13           | male       | 67.2       | early HD              | 41              | 21             |
| HDClarity           | EMHD14           | male       | 52.8       | early HD              | 42              | 18             |
| HDClarity           | EMHD15           | female     | 45.8       | early HD              | 44              | 10             |
| HDClarity           | EMHD16           | male       | 42.3       | early HD              | 43              | 17             |
| HDClarity           | EMHD17           | male       | 45.9       | early HD              | 43              | 17             |
| HDClarity           | EMHD18           | female     | 55.4       | early HD              | 45              | 22             |
| HDClarity           | EMHD19           | female     | 63.2       | early HD              | 41              | 17             |
| HDClarity           | EMHD20           | male       | 64.1       | early HD              | 45              | 18             |
| HDClarity           | EMHD21           | male       | 33.5       | early HD              | 50              | 18             |
| HDClarity           | EMHD22           | female     | 47.5       | early HD              | 44              | 18             |
| HDClarity           | EMHD23           | female     | 55.2       | early HD              | 40              | 17             |
| HDClarity           | EMHD24           | male       | 57.8       | early HD              | 42              | 18             |
| HDClarity           | EMHD25           | male       | 63.5       | early HD              | 41              | 17             |
| HDClarity           | EMHD26           | female     | 70         | early HD              | 41              | 17             |
| HDClarity           | EMHD27           | female     | 40.9       | early HD              | 45              | 17             |
| HDClarity           | EMHD28           | male       | 47.3       | early HD              | 43              | 18             |
| HDClarity           | EMHD29           | male       | 52.6       | early HD              | 37              | 17             |
| HDClarity           | EMHD30           | female     | 58.9       | early HD              | 41              | 18             |
| HDClarity           | EMHD31           | female     | 60         | early HD              | 41              | 20             |
| HDClarity           | EMHD32           | male       | 69.3       | early HD              | 42              | 15             |
| HDClarity           | EPMHD1           | female     | 26.4       | early pre-manifest HD | 41              | 15             |
| HDClarity           | EPMHD2           | male       | 51.5       | early pre-manifest HD | 40              | 17             |
| HDClarity           | EPMHD3           | male       | 33.4       | early pre-manifest HD | 42              | 20             |
| HDClarity           | EPMHD4           | female     | 47         | early pre-manifest HD | 40              | 17             |

|           |         |        |      |                       |    |    |
|-----------|---------|--------|------|-----------------------|----|----|
| HDClarity | EPMHD5  | female | 52.6 | early pre-manifest HD | 40 | 18 |
| HDClarity | EPMHD6  | female | 35   | early pre-manifest HD | 41 | 18 |
| HDClarity | EPMHD7  | male   | 25.3 | early pre-manifest HD | 41 | 17 |
| HDClarity | EPMHD8  | female | 29.1 | early pre-manifest HD | 42 | 17 |
| HDClarity | EPMHD9  | male   | 25.9 | early pre-manifest HD | 40 | 21 |
| HDClarity | EPMHD10 | female | 31   | early pre-manifest HD | 43 | 17 |
| HDClarity | EPMHD11 | female | 33.8 | early pre-manifest HD | 42 | 22 |
| HDClarity | EPMHD12 | female | 34.8 | early pre-manifest HD | 41 | 16 |
| HDClarity | EPMHD13 | male   | 37   | early pre-manifest HD | 42 | 19 |
| HDClarity | LPMHD1  | male   | 41   | late pre-manifest HD  | 42 | 17 |
| HDClarity | LPMHD2  | female | 33.7 | late pre-manifest HD  | 45 | 15 |
| HDClarity | LPMHD3  | male   | 22.7 | late pre-manifest HD  | 47 | 17 |
| HDClarity | LPMHD4  | female | 64.2 | late pre-manifest HD  | 41 | 17 |
| HDClarity | LPMHD5  | female | 49.1 | late pre-manifest HD  | 43 | 20 |
| HDClarity | LPMHD6  | male   | 57   | late pre-manifest HD  | 41 | 17 |
| HDClarity | LPMHD7  | male   | 31.4 | late pre-manifest HD  | 44 | 21 |
| HDClarity | LPMHD8  | female | 24.5 | late pre-manifest HD  | 47 | 22 |
| HDClarity | LPMHD9  | male   | 54.4 | late pre-manifest HD  | 45 | 18 |
| HDClarity | LPMHD10 | female | 41.8 | late pre-manifest HD  | 46 | 20 |
| HDClarity | LPMHD11 | female | 47.1 | late pre-manifest HD  | 42 | 21 |
| HDClarity | LPMHD12 | male   | 53.6 | late pre-manifest HD  | 41 | 17 |
| HDClarity | LPMHD13 | male   | 27.4 | late pre-manifest HD  | 45 | 18 |
| HDClarity | LPMHD14 | female | 43.6 | late pre-manifest HD  | 44 | 17 |
| HDClarity | LPMHD15 | male   | 45.7 | late pre-manifest HD  | 44 | 19 |
| HDClarity | LPMHD16 | female | 50.6 | late pre-manifest HD  | 41 | 21 |
| HDClarity | LPMHD17 | female | 29.9 | late pre-manifest HD  | 44 | 15 |
| HDClarity | LPMHD18 | male   | 46.8 | late pre-manifest HD  | 43 | 15 |
| HDClarity | LPMHD19 | male   | 47.4 | late pre-manifest HD  | 41 | 18 |
| HDClarity | HC1     | female | 48.2 | healthy control       | 21 | 18 |
| HDClarity | HC2     | female | 52.8 | healthy control       | 24 | 22 |
| HDClarity | HC3     | male   | 62   | healthy control       | 17 | 17 |
| HDClarity | HC4     | female | 29.2 | healthy control       | 22 | 14 |
| HDClarity | HC5     | male   | 54.6 | healthy control       | 24 | 17 |
| HDClarity | HC6     | male   | 33.5 | healthy control       | 24 | 17 |
| HDClarity | HC7     | male   | 71.9 | healthy control       | 17 | 17 |
| HDClarity | HC8     | male   | 52   | healthy control       | 17 | 9  |
| HDClarity | HC9     | female | 43.2 | healthy control       | 20 | 18 |
| HDClarity | HC10    | female | 53.2 | healthy control       | 22 | 19 |
| HDClarity | HC11    | male   | 53.7 | healthy control       | 16 | 16 |

|           |         |        |      |                       |         |         |
|-----------|---------|--------|------|-----------------------|---------|---------|
| HDClarity | HC12    | male   | 74.6 | healthy control       | 17      | 15      |
| HDClarity | HC13    | female | 58.4 | healthy control       | 17      | 15      |
| HDClarity | HC14    | female | 39.6 | healthy control       | 18      | 9       |
| HDClarity | HC15    | male   | 26.5 | healthy control       | 20      | 16      |
| HDClarity | HC16    | female | 49   | healthy control       | 18      | 17      |
| HDClarity | HC17    | female | 28.9 | healthy control       | 18      | 17      |
| HDClarity | HC18    | male   | 48.3 | healthy control       | 15      | 15      |
| HDClarity | HC19    | male   | 50.6 | healthy control       | 17      | 15      |
| HDClarity | HC20    | female | 53.4 | healthy control       | 12      | 10      |
| HDClarity | HC21    | male   | 54   | healthy control       | 21      | 17      |
| HDClarity | HC22    | female | 61   | healthy control       | 24      | 20      |
| HDClarity | HC23    | male   | 35.4 | healthy control       | 19      | 15      |
| HDClarity | HC24    | female | 46.8 | healthy control       | 17      | 17      |
| HDClarity | HC25    | male   | 52.2 | healthy control       | 19      | 17      |
| HDClarity | HC26    | female | 55.1 | healthy control       | 22      | 19      |
| HDClarity | HC27    | male   | 57   | healthy control       | 17      | 15      |
| HDClarity | HC28    | male   | 37.4 | healthy control       | 24      | 19      |
| HDClarity | HC29    | female | 44.7 | healthy control       | 17      | 17      |
| HDClarity | HC30    | male   | 52.5 | healthy control       | 22      | 15      |
| HDClarity | HC31    | female | 53.1 | healthy control       | 17      | 17      |
| HDClarity | HC32    | male   | 56.5 | healthy control       | 18      | 17      |
| U of W    | EPMHD14 | female | 31   | early pre-manifest HD | 40      | unknown |
| U of W    | LPMHD20 | female | 34   | late pre-manifest HD  | 50      | unknown |
| U of W    | LPMHD21 | male   | 46   | late pre-manifest HD  | 42      | unknown |
| U of W    | LPMHD22 | male   | 55   | late pre-manifest HD  | 42      | unknown |
| U of W    | LPMHD23 | female | 53   | late pre-manifest HD  | 46      | unknown |
| U of W    | LPMHD24 | female | 38   | late pre-manifest HD  | 48      | unknown |
| U of W    | LPMHD25 | male   | 31   | late pre-manifest HD  | 44      | unknown |
| U of W    | LPMHD26 | male   | 35   | late pre-manifest HD  | 35      | unknown |
| U of W    | LPMHD27 | female | 52   | late pre-manifest HD  | 42      | unknown |
| U of W    | LPMHD28 | male   | 42   | late pre-manifest HD  | 42      | unknown |
| U of W    | HC33    | female | 59   | Healthy control       | unknown | unknown |
| U of W    | HC34    | female | 21   | Healthy control       | unknown | unknown |
| U of W    | HC35    | female | 20   | Healthy control       | unknown | unknown |
| U of W    | HC36    | female | 51   | Healthy control       | unknown | unknown |
| U of W    | HC37    | female | 57   | Healthy control       | unknown | unknown |
| U of W    | HC38    | female | 60   | Healthy control       | unknown | unknown |

U of W = University of Washington  
EMHD = Early manifest HD  
EPMHD = Early pre-manifest HD  
LPHHD = Late pre-manifest HD  
HC = Healthy control

## Supplemental Table 2

| Sample ID | Source              | Sample preparation  | Sex    | PMI   | Age at death | Sample Type | CAG low/high | Onset | COD                        | Brain Region    | Vonsattel Grade |
|-----------|---------------------|---------------------|--------|-------|--------------|-------------|--------------|-------|----------------------------|-----------------|-----------------|
| HC113     | NZ Human Brain Bank | Fixed tissue        | Male   | 14    | 58           | HD          | 28/44        | .     | Broncho-pneumonia          | Caudate Nucleus | 2               |
| HC114     | NZ Human Brain Bank | Fixed tissue        | Female | 12    | 53           | HD          | 21/47        | .     | Pneumonia                  | Caudate Nucleus | 2               |
| HC120     | NZ Human Brain Bank | Fixed tissue        | Male   | 15    | 51           | HD          | 10/46        | .     | Pneumonia                  | Caudate Nucleus | 2               |
| HC126     | NZ Human Brain Bank | Fixed tissue        | Male   | 8     | 61           | HD          | 17/43        | .     | Pneumonia                  | Caudate Nucleus | 2               |
| HC109     | NZ Human Brain Bank | Fixed tissue        | Female | 7     | 59           | HD          | 23/47        | .     | Bronchopneumonia           | Caudate Nucleus | 4               |
| HC116     | NZ Human Brain Bank | Fixed tissue        | Male   | 8     | 54           | HD          | 17/46        | .     | Pneumonia                  | Caudate Nucleus | 4               |
| HC122     | NZ Human Brain Bank | Fixed tissue        | Male   | .     | 52           | HD          | 10/50        | .     | Bowel obstruction          | Caudate Nucleus | 4               |
| HC143     | NZ Human Brain Bank | Fixed tissue        | Female | 16    | 45           | HD          | .            | .     | Respiratory arrest         | Caudate Nucleus | 4               |
| H170      | NZ Human Brain Bank | Fixed tissue        | Male   | 17    | 60           | Control     | 10/17        | N/A   | Ischemic heart disease     | Caudate Nucleus | N/A             |
| H189      | NZ Human Brain Bank | Fixed tissue        | Male   | 16    | 41           | Control     | 18/22        | N/A   | Asphyxia                   | Caudate Nucleus | N/A             |
| H165      | NZ Human Brain Bank | Fixed tissue        | Female | 26    | 43           | Control     | 17/17        | N/A   | Nitrogen poisoning         | Caudate Nucleus | N/A             |
| H238      | NZ Human Brain Bank | Fixed tissue        | Female | 16    | 63           | Control     | 14/16        | N/A   | Dissecting aortic aneurysm | Caudate Nucleus | N/A             |
| H145      | NZ Human Brain Bank | Fixed tissue        | Male   | 6.5   | 54           | Control     | .            | N/A   | Ischemic heart disease     | Caudate Nucleus | N/A             |
| H140      | NZ Human Brain Bank | Fixed tissue        | Male   | 16    | 51           | Control     | .            | N/A   | Cardiomyopathy             | Caudate Nucleus | N/A             |
| B3470     | Boston University   | Fresh frozen tissue | Male   | 57.30 | 89           | HD          | 40           | 70    | .                          | Globus Pallidus | 3               |
| B3701     | Boston University   | Fresh frozen tissue | Female | 14.30 | 67           | HD          | 44           | 40    | .                          | Globus Pallidus | 3               |

|         |                                              |                     |        |       |    |         |     |     |                          |                     |     |
|---------|----------------------------------------------|---------------------|--------|-------|----|---------|-----|-----|--------------------------|---------------------|-----|
| B3703   | Boston University                            | Fresh frozen tissue | Female | 25.00 | 61 | HD      | 45  | 35  | .                        | Globus Pallidus     | 3   |
| B4183   | Boston University                            | Fresh frozen tissue | Female | 20.30 | 76 | HD      | 43  | .   | .                        | Globus Pallidus     | 4   |
| B4230   | Boston University                            | Fresh frozen tissue | Male   | 7.08  | 76 | HD      | 41  | 58  | .                        | Globus Pallidus     | 3   |
| B4255   | Boston University                            | Fresh frozen tissue | Female | 17.50 | 52 | HD      | 47  | .   | .                        | Globus Pallidus     | 4   |
| 5222    | Human brain and spinal fluid resource center | Fresh frozen tissue | Male   | .     | 61 | Control | N/A | N/A | Micro-infarct (cerebrum) | Globus Pallidus     | N/A |
| 5214    | Human brain and spinal fluid resource center | Fresh frozen tissue | Male   | .     | 61 | Control | N/A | N/A | .                        | Globus Pallidus     | N/A |
| 5293    | Human brain and spinal fluid resource center | Fresh frozen tissue | Female | .     | 41 | Control | N/A | N/A | Liver failure            | Globus Pallidus     | N/A |
| 4308    | Human brain and spinal fluid resource center | Fresh frozen tissue | Male   | .     | 70 | Control | N/A | N/A | Myocardial infarction    | Globus Pallidus     | N/A |
| 5190    | Human brain and spinal fluid resource center | Fresh frozen tissue | Male   | .     | 68 | Control | N/A | N/A | Myocardial infarction    | Globus Pallidus     | N/A |
| AN05954 | Boston University                            | Fresh frozen tissue | Male   | .     | 49 | Pre-HD  | .   | N/A | .                        | Caudate and Putamen | N/A |
| AN16102 | Boston University                            | Fresh frozen tissue | Female | .     | 86 | Pre-HD  | .   | N/A | .                        | Caudate and Putamen | N/A |

|         |                   |                     |        |   |    |         |     |     |   |                     |     |
|---------|-------------------|---------------------|--------|---|----|---------|-----|-----|---|---------------------|-----|
| AN18592 | Boston University | Fresh frozen tissue | Female | . | 82 | Control | N/A | N/A | . | Caudate and Putamen | N/A |
| AN15392 | Boston University | Fresh frozen tissue | Male   | . | 51 | Control | N/A | N/A | . | Caudate and Putamen | N/A |

PMI = post mortem interval

COD = cause of death

HD = Huntington's disease

N/A = not applicable

. = unknown

Supplemental Table 3

| Figure | Panel | Genotype     | Age   | Brain region/Synaptic population | Treatment                      | No. of male mice | No. of female mice |
|--------|-------|--------------|-------|----------------------------------|--------------------------------|------------------|--------------------|
| 2      | b     | WT           | 7 mo  | Striatum                         | N/A                            | 2                | 1                  |
| 2      | b     | zQ175        | 7 mo  | Striatum                         | N/A                            | 2                | 1                  |
| 2      | c     | WT           | 1 mo  | Striatum                         | N/A                            | 3                | 4                  |
| 2      | c     | zQ175        | 1 mo  | Striatum                         | N/A                            | 3                | 4                  |
| 2      | c     | WT           | 3 mo  | Striatum                         | N/A                            | 3                | 3                  |
| 2      | c     | zQ175        | 3 mo  | Striatum                         | N/A                            | 3                | 3                  |
| 2      | c     | WT           | 7 mo  | Striatum                         | N/A                            | 3                | 3                  |
| 2      | c     | zQ175        | 7 mo  | Striatum                         | N/A                            | 3                | 3                  |
| 2      | d     | WT           | 7 mo  | Striatum                         | N/A                            | 2                | 3                  |
| 2      | d     | zQ175        | 7 mo  | Striatum                         | N/A                            | 2                | 3                  |
| 2      | e     | WT           | 3 mo  | Striatum                         | N/A                            | 3                | 3                  |
| 2      | e     | zQ175        | 3 mo  | Striatum                         | N/A                            | 3                | 3                  |
| 2      | f     | WT           | 3 mo  | Striatum                         | N/A                            | 2                | 3                  |
| 2      | f     | zQ175        | 3mo   | Striatum                         | N/A                            | 3                | 3                  |
| 3      | b     | WT           | 7 mo  | Striatum                         | N/A                            | 2                | 2                  |
| 3      | b     | zQ175        | 7 mo  | Striatum                         | N/A                            | 2                | 2                  |
| 3      | b     | WT           | 7 mo  | Motor cortex                     | N/A                            | 1                | 2                  |
| 3      | b     | zQ175        | 7 mo  | Motor cortex                     | N/A                            | 1                | 2                  |
| 3      | b     | WT           | 7 mo  | Hippocampus                      | N/A                            | 1                | 2                  |
| 3      | b     | zQ175        | 7 mo  | Hippocampus                      | N/A                            | 2                | 2                  |
| 3      | c     | WT           | 3 mo  | Striatum                         | N/A                            | 2                | 3                  |
| 3      | c     | zQ175        | 3 mo  | Striatum                         | N/A                            | 2                | 3                  |
| 3      | c     | WT           | 7 mo  | Striatum                         | N/A                            | 2                | 2                  |
| 3      | c     | zQ175        | 7 mo  | Striatum                         | N/A                            | 2                | 2                  |
| 3      | c     | WT           | 12 mo | Striatum                         | N/A                            | 1                | 2                  |
| 3      | c     | zQ175        | 12 mo | Striatum                         | N/A                            | 1                | 2                  |
| 3      | e     | WT           | 7 mo  | Striatum                         | N/A                            | 2                | 3                  |
| 3      | e     | zQ175        | 7 mo  | Striatum                         | N/A                            | 2                | 3                  |
| 3      | e     | WT           | 7 mo  | Motor cortex                     | N/A                            | 2                | 2                  |
| 3      | e     | zQ175        | 7 mo  | Motor cortex                     | N/A                            | 2                | 2                  |
| 3      | e     | WT           | 7 mo  | Hippocampus                      | N/A                            | 2                | 2                  |
| 3      | e     | zQ175        | 7 mo  | Hippocampus                      | N/A                            | 2                | 2                  |
| 3      | f     | WT           | 3 mo  | Striatum                         | N/A                            | 2                | 3                  |
| 3      | f     | zQ175        | 3 mo  | Striatum                         | N/A                            | 2                | 3                  |
| 3      | f     | WT           | 7 mo  | Striatum                         | N/A                            | 2                | 3                  |
| 3      | f     | zQ175        | 7 mo  | Striatum                         | N/A                            | 2                | 3                  |
| 3      | f     | WT           | 12 mo | Striatum                         | N/A                            | 2                | 2                  |
| 3      | f     | zQ175        | 12 mo | Striatum                         | N/A                            | 2                | 2                  |
| 3      | g     | WT           | 3 mo  | Corticostriatal                  | N/A                            | 2                | 2                  |
| 3      | g     | zQ175        | 3 mo  | Corticostriatal                  | N/A                            | 2                | 2                  |
| 3      | g     | WT           | 3 mo  | Thalamostriatal                  | N/A                            | 2                | 2                  |
| 3      | g     | zQ175        | 3 mo  | Thalamostriatal                  | N/A                            | 2                | 2                  |
| 3      | h     | WT           | 3 mo  | Striatum                         | N/A                            | 2                | 2                  |
| 3      | h     | zQ175        | 3 mo  | Striatum                         | N/A                            | 2                | 1                  |
| 4      | b     | WT           | 4 mo  | Striatum                         | N/A                            | 2                | 2                  |
| 4      | b     | zQ175        | 4 mo  | Striatum                         | N/A                            | 2                | 4                  |
| 4      | c     | WT           | 4 mo  | Striatum                         | N/A                            | 2                | 3                  |
| 4      | c     | zQ175        | 4 mo  | Striatum                         | N/A                            | 2                | 3                  |
| 4      | e     | WT           | 12 mo | Striatum                         | N/A                            | 2                | 2                  |
| 4      | e     | BACHD        | 12 mo | Striatum                         | N/A                            | 2                | 2                  |
| 4      | e     | BR           | 12 mo | Striatum                         | N/A                            | 2                | 2                  |
| 4      | e     | BE           | 12 mo | Striatum                         | N/A                            | 1                | 2                  |
| 4      | e     | BER          | 12 mo | Striatum                         | N/A                            | 2                | 2                  |
| 4      | f     | WT           | 12 mo | Striatum                         | N/A                            | 3                | 2                  |
| 4      | f     | BACHD        | 12 mo | Striatum                         | N/A                            | 1                | 2                  |
| 4      | f     | BR           | 12 mo | Striatum                         | N/A                            | 2                | 2                  |
| 4      | f     | BE           | 12 mo | Striatum                         | N/A                            | 1                | 2                  |
| 4      | f     | BER          | 12 mo | Striatum                         | N/A                            | 1                | 2                  |
| 4      | g     | WT           | 12 mo | Striatum                         | N/A                            | 3                | 2                  |
| 4      | g     | BACHD        | 12 mo | Striatum                         | N/A                            | 2                | 2                  |
| 4      | g     | BR           | 12 mo | Striatum                         | N/A                            | 2                | 2                  |
| 4      | g     | BE           | 12 mo | Striatum                         | N/A                            | 1                | 2                  |
| 4      | g     | BER          | 12 mo | Striatum                         | N/A                            | 1                | 2                  |
| 5      | b     | zQ175        | 4 mo  | Striatum                         | control IgG                    | 2                | 3                  |
| 5      | b     | zQ175        | 4 mo  | Striatum                         | C1q function blocking antibody | 2                | 3                  |
| 5      | c     | zQ175        | 4 mo  | Striatum                         | control IgG                    | 3                | 4                  |
| 5      | c     | zQ175        | 4 mo  | Striatum                         | C1q function blocking antibody | 3                | 3                  |
| 5      | e     | WT           | 5mo   | Striatum                         | control IgG                    | 3                | 4                  |
| 5      | e     | WT           | 5mo   | Striatum                         | C1q function blocking antibody | 3                | 4                  |
| 5      | e     | zQ175        | 5mo   | Striatum                         | control IgG                    | 2                | 2                  |
| 5      | e     | zQ175        | 5mo   | Striatum                         | C1q function blocking antibody | 3                | 4                  |
| 5      | f     | WT           | 5mo   | Striatum                         | control IgG                    | 3                | 4                  |
| 5      | f     | WT           | 5mo   | Striatum                         | C1q function blocking antibody | 3                | 4                  |
| 5      | f     | zQ175        | 5mo   | Striatum                         | control IgG                    | 2                | 2                  |
| 5      | f     | zQ175        | 5mo   | Striatum                         | C1q function blocking antibody | 3                | 4                  |
| 5      | h     | zQ175        | 4 mo  | Striatum                         | N/A                            | 3                | 2                  |
| 5      | h     | zQ175 CR3 KO | 4 mo  | Striatum                         | N/A                            | 2                | 2                  |
| 5      | i     | WT           | 4 mo  | Striatum                         | N/A                            | 16               | 12                 |
| 5      | i     | zQ175        | 4 mo  | Striatum                         | N/A                            | 8                | 10                 |
| 5      | i     | CR3 KO       | 4 mo  | Striatum                         | N/A                            | 13               | 11                 |
| 5      | i     | zQ175 CR3 KO | 4 mo  | Striatum                         | N/A                            | 9                | 4                  |
| 5      | i     | WT           | 4 mo  | Striatum                         | N/A                            | 16               | 12                 |
| 5      | i     | zQ175        | 4 mo  | Striatum                         | N/A                            | 8                | 10                 |
| 5      | i     | CR3 KO       | 4 mo  | Striatum                         | N/A                            | 13               | 11                 |
| 5      | i     | zQ175 CR3 KO | 4 mo  | Striatum                         | N/A                            | 9                | 4                  |



## Supplemental Table 4

### CR3 genotyping

#### Reagent setup

| Reagent                                              | $\mu$ l per reaction |
|------------------------------------------------------|----------------------|
| DNA                                                  | 1                    |
| Water                                                | 2.5                  |
| CR3 Primer 1478 (5 $\mu$ M)<br>TAGGCTATCCAGAGGTAGAC  | 0.5                  |
| CR3 Primer 1479 (5 $\mu$ M)<br>CATACCTGTGACCAGAAGAGC | 0.5                  |
| CR3 Primer 070 (5 $\mu$ M)<br>ATCGCCTTCTTGACGAGTTC   | 0.5                  |
| Apex Red Taq DNA Master Mix, 2X                      | 5                    |

#### Thermocycling

| Step | Temperature  | Time/cycles |
|------|--------------|-------------|
| 1    | 94°C         | 3 min       |
| 2    | 94°C         | 30 sec      |
| 3    | 58°C         | 1 min       |
| 4    | 72°C         | 1 min       |
| 5    | Go to Step 2 | 35 cycles   |
| 6    | 72°C         | 2 min       |
| 7    | 10°C         | Forever     |

#### Expected band sizes

CR3 KO 700bp

CR3 WT 350bp

### Homer GFP genotyping

#### Reagent setup

| Reagent                         | $\mu$ l per reaction |
|---------------------------------|----------------------|
| DNA                             | 1                    |
| Water                           | 3                    |
| Homer GFP FW primer (5 $\mu$ M) | 0.5                  |

|                                                                     |            |
|---------------------------------------------------------------------|------------|
| <u>CCTACGGCGTGCAGTGCTTCAGC</u>                                      |            |
| Homer GFP Rev primer (5 $\mu$ M)<br><u>CGGCGAGCTGCACGCTGCGTCCTC</u> | <u>0.5</u> |
| Apex Red Taq DNA Master Mix, 2x                                     | <u>5</u>   |

Thermocycling

| <u>Step</u> | <u>Temperature</u>  | <u>Time/cycles</u> |
|-------------|---------------------|--------------------|
| <u>1</u>    | <u>95°C</u>         | <u>5 min</u>       |
| <u>2</u>    | <u>95°C</u>         | <u>30 sec</u>      |
| <u>3</u>    | <u>50°C</u>         | <u>30 sec</u>      |
| <u>4</u>    | <u>72°C</u>         | <u>1 min</u>       |
| <u>5</u>    | <u>Go to Step 2</u> | <u>30 cycles</u>   |
| <u>6</u>    | <u>72°C</u>         | <u>5 min</u>       |
| <u>7</u>    | <u>10°C</u>         | <u>Forever</u>     |

Expected band sizes

Homer-GFP 370 bp

## KEY RESOURCES TABLE

| REAGENT or RESOURCE                                          | SOURCE                                       | IDENTIFIER                                                                                     |
|--------------------------------------------------------------|----------------------------------------------|------------------------------------------------------------------------------------------------|
| Antibodies                                                   |                                              |                                                                                                |
| Homer1                                                       | Synaptic systems                             | Cat#160-003; RRID:AB_887730                                                                    |
| VGLUT1                                                       | Millipore Sigma                              | Cat#AB5905; RRID:AB_2301751                                                                    |
| VGLUT2                                                       | Millipore Sigma                              | Cat#AB2251, RRID:AB_2665454                                                                    |
| PSD-95                                                       | Millipore Sigma                              | Cat#MAB1596, RRID:AB_2092365                                                                   |
| Iba-1                                                        | Wako                                         | Cat# 019-19741, RRID:AB_839504                                                                 |
| Iba-1                                                        | Wako                                         | Cat# ncnp24, RRID:AB_2811160                                                                   |
| CD11b                                                        | Serotec                                      | Cat# MCA711G; RRID:AB_321292                                                                   |
| CD68                                                         | Serotec                                      | Cat# MCA1957; RRID:AB_322219                                                                   |
| CD68                                                         | Agilent Dako                                 | Cat# M087629-2; RRID:AB_2074844                                                                |
| P2RY12                                                       | Anaspec                                      | Cat# AS-55043A; RRID:AB_2298886                                                                |
| TMEM119                                                      | Abcam                                        | Cat# ab209064; RRID:AB_2800343                                                                 |
| C1q                                                          | Abcam                                        | Cat# ab182451; RRID:AB_2732849                                                                 |
| C1q                                                          | Agilent Dako                                 | Cat# A0136; RRID:AB_2335698                                                                    |
| C1q [JL-1]                                                   | Abcam                                        | Cat# ab71940; RRID:AB_10711046                                                                 |
| C3d                                                          | Agilent Dako                                 | Cat# A006302; RRID:AB_578478                                                                   |
| C3c                                                          | Agilent Dako                                 | Cat# F0201; RRID:AB_2335709                                                                    |
| iC3B                                                         | Quidel                                       | Cat# A209; RRID:AB_452480                                                                      |
| $\beta$ -actin                                               | Millipore Sigma                              | Cat#A2228; RRID:AB_476697                                                                      |
| S100 $\beta$                                                 | Agilent Dako                                 | Cat#Z0311; RRID:AB_10013383                                                                    |
| Secondary antibodies, Alexa Fluor conjugates various species | Thermo Fisher Scientific - Life Technologies | Cat#'s A-11073, A-11006, A-11012, A-21245; RRID's AB_2534117, AB_2534074, AB_141359, AB_141775 |
| Digoxigenin                                                  | Roche                                        | Cat#11207733910; RRIDAB_514500                                                                 |
| Fluorescein                                                  | Roche                                        | Cat#11426346910; RRIDAB_840257                                                                 |
| Goat anti rabbit alkaline phosphatase                        | Abcam                                        | Cat#ab97048; RRID:AB_10680574                                                                  |

|                                                        |                              |                                     |
|--------------------------------------------------------|------------------------------|-------------------------------------|
| Goat anti rabbit HRP                                   | Promega                      | Cat#W4011;<br>RRID:AB_430833        |
| Peroxidase-AffiniPure Donkey anti-guinea pig IgG (H+L) | Jackson ImmunoResearch       | Cat# 706-035-148<br>RRID:AB_2340447 |
| Chemicals, Peptides, and Recombinant Proteins          |                              |                                     |
| iC3B protein                                           | Complement technologies      | Cat# A115                           |
| C3c protein                                            | Complement technologies      | Cat# A116                           |
| C3 protein                                             | Complement technologies      | Cat# A113                           |
| C1q protein                                            | Quidel                       | Cat# A400                           |
| Zymosan (preactivated)                                 | Complement technologies      | Cat# B400                           |
| C3/C4 inactivated serum                                | Complement technologies      | Cat# A340                           |
| C3 depleted sera                                       | Quidel                       | Cat# A508                           |
| C1q depleted sera                                      | Quidel                       | Cat# A509                           |
| NaCl                                                   | Millipore Sigma              | Cat# S9888                          |
| KCl                                                    | Millipore Sigma              | Cat# P3911                          |
| NaHCO <sub>3</sub>                                     | Millipore Sigma              | Cat# S6014                          |
| CaCl <sub>2</sub>                                      | Millipore Sigma              | Cat# C1016                          |
| MgCl <sub>2</sub>                                      | Millipore Sigma              | Cat# 208337                         |
| NaH <sub>2</sub> PO <sub>4</sub>                       | Millipore Sigma              | Cat# S3139                          |
| Glucose                                                | Millipore Sigma              | Cat# G8270                          |
| Choline chloride                                       | Millipore Sigma              | Cat# C7017                          |
| Ascorbic acid                                          | Millipore Sigma              | Cat# 1043003                        |
| Pyruvic acid                                           | Millipore Sigma              | Cat# 107360                         |
| InVivoMab mouse IgG1 isotype control                   | Bio X Cell                   | Cat# BE0083;<br>RRIDAB_1107784      |
| Gabazine                                               | Millipore Sigma              | Cat# S106                           |
| CsMeSO <sub>3</sub>                                    | Millipore Sigma              | Cat# C1426                          |
| Hepes                                                  | Millipore Sigma              | Cat# 54457                          |
| EDTA                                                   | Millipore Sigma              | Cat# 324626                         |
| MgATP                                                  | Millipore Sigma              | Cat# A9187                          |
| QX-314                                                 | Millipore Sigma              | Cat# 552233                         |
| Na-GTP                                                 | Millipore Sigma              | Cat# 51120                          |
| Phosphocreatine                                        | Millipore Sigma              | Cat# P7936                          |
| CsOH                                                   | Millipore Sigma              | Cat# 232068                         |
| 16% paraformaldehyde                                   | Electron microscope sciences | Cat# 15700                          |
| KH <sub>2</sub> PO <sub>4</sub>                        | Millipore Sigma              | Cat# NIST200B                       |
| Sucrose                                                | Millipore Sigma              | Cat# S0389                          |
| Tissue-Tek O.C.T. Compound                             | Electron microscope sciences | Cat# 4583                           |
| Bovine serum albumin                                   | Millipore Sigma              | Cat# A2153                          |
| Triton-X 100                                           | Millipore Sigma              | Cat# T8787                          |

|                                                         |                                                                      |                                  |
|---------------------------------------------------------|----------------------------------------------------------------------|----------------------------------|
| Normal goat serum                                       | Millipore Sigma                                                      | Cat# G9023                       |
| Vectashield with DAPI                                   | Vector Laboratories                                                  | Cat# H-1000                      |
| 2,2'-Thiodiethanol                                      | Millipore Sigma                                                      | Cat# 166782                      |
| Dabco 33-LV                                             | Millipore Sigma                                                      | Cat# 290734                      |
| Apex Red Taq DNA Master Mix, 2.0X                       | Genesee Scientific                                                   | Cat# 42-138                      |
| Power SYBR Green PCR Master Mix                         | Thermo Fisher Scientific                                             | Cat# 4368708                     |
| 1-Step PNPP Substrate solution                          | Thermo Fisher Scientific                                             | Cat# 37621                       |
| ReBlot Plus Strong Antibody Stripping Solution 10x      | EMD Millipore                                                        | Cat# 2504                        |
| Precision Plus Protein Kaleidoscope Standards           | Bio-Rad                                                              | Cat# 161-0375                    |
| Super signal West Dura Substrate Trial Kit              | Thermo Fisher Scientific                                             | Cat# 37076                       |
| Glycine                                                 | Thermo Fisher Scientific - Fisher Bioreagents                        | Cat# BP381-1                     |
| ROCHE cOmplete protease inhibitor cocktail              | Millipore Sigma                                                      | Cat# 4693116001                  |
| Sudan Black B                                           | Millipore Sigma                                                      | Cat# 199664                      |
| Glycerol                                                | Millipore Sigma                                                      | Cat# G5516                       |
| Hoechst                                                 | Thermo Fisher Scientific                                             | Cat# H3570                       |
| LR white resin                                          | Millipore Sigma                                                      | Cat# 62661                       |
| L-lysine                                                | Millipore Sigma                                                      | Cat# L5501                       |
| Sodium azide                                            | Millipore Sigma                                                      | Cat# 71289                       |
| Laemmli buffer                                          | Bio-Rad                                                              | Cat# 161-0737                    |
| Sodium hydroxide                                        | Millipore Sigma                                                      | Cat# 221465                      |
| Tris                                                    | Thermo Fisher Scientific                                             | Cat# 15504020                    |
| SDS (sodium dodecyl sulphate)                           | Bio-Rad                                                              | Cat# 1610301                     |
| Proteinase K                                            | Worthington Biochemical                                              | Cat# LS004222                    |
| Phenol: Chloroform: Isoamyl Alcohol                     | Thermo Fisher Scientific                                             | Cat# 15593031                    |
| Ethyl, alcohol, Pure                                    | Millipore Sigma                                                      | Cat# E7023                       |
| Trizma base                                             | Millipore Sigma                                                      | Cat# T1503                       |
| Methanol                                                | Millipore Sigma                                                      | Cat# 179957                      |
| Triethanolamine                                         | Millipore Sigma                                                      | Cat # T58300                     |
| Acetic anhydride                                        | Millipore Sigma                                                      | Cat# AX0080-6                    |
| Hydrogen peroxide                                       | Millipore Sigma                                                      | Cat# 95321                       |
| <b>Experimental Models: Organisms/Strains</b>           |                                                                      |                                  |
| Mouse: zQ175/ B6J.zQ175 KI                              | The Jackson Laboratory                                               | Cat#027410; RRID:IMSR JAX:027410 |
| Mouse: BACHD (and its variants BE/BR/BER <sup>1</sup> ) | The Jackson Laboratory                                               | Cat#008197; RRID:IMSR JAX:008197 |
| Mouse: CR3KO/ B6.129S4-Ilgam <sup>tm1Myd</sup> 2        | The Jackson Laboratory                                               | Cat#003991; RRID:IMSR_JAX:003991 |
| Mouse: Homer GFP <sup>3</sup>                           | From the laboratory of Professor Shigeo Okabe (Ebihara et al., 2003) | N/A                              |

| Oligonucleotides                                     |                         |                                            |
|------------------------------------------------------|-------------------------|--------------------------------------------|
| CR3 (Genotyping 1)<br>TAGGCTATCCAGAGGTAGAC           | This paper              | N/A                                        |
| CR3 (Genotyping 2)<br>CATACCTGTGACCAGAAGAGC          | This paper              | N/A                                        |
| CR3 (Genotyping 3)<br>ATCGCCTTCTTGACGAGTTC           | This paper              | N/A                                        |
| Homer GFP (Genotyping 1)<br>CCTACGGCGTGCAGTGCTTCAGC  | This paper              | N/A                                        |
| Homer GFP (Genotyping 2)<br>CGGCGAGCTGCACGCTGCGTCCTC | This paper              | N/A                                        |
| zQ175 hdh1 (Genotyping)<br>CATTCAATGCCTTGCTGCTAAG    | Laragen                 | N/A                                        |
| zQ175 hdh2 (Genotyping)<br>CTGAAACGACTTGAGCGACTC     | Laragen                 | N/A                                        |
| zQ175 Neo1 (Genotyping)<br>GATCGGCCATTGAACAAGATG     | The Jackson Laboratory  |                                            |
| zQ175 Neo2 (Genotyping)<br>AGAGCAGCCGATTGTCTGTTG     | The Jackson Laboratory  |                                            |
| GAPDH fw (RT-qPCR)<br>AGGTCGGTGTGAACGGATTTG          | This paper              | N/A                                        |
| GAPDH rev (RT-qPCR)<br>TGTAGACCATGTAGTTGAGGTCA       | This paper              | N/A                                        |
| P2RY12 mouse fw (RT-qPCR)<br>CACAGAGGGCTTTGGGAACCTA  | This paper              | N/A                                        |
| P2RY12 mouse rev (RT-qPCR)<br>TGGTCCTGCTTCTGCTGAATC  | This paper              | N/A                                        |
| Iba-1 mouse fw (RT-qPCR)<br>ATCAACAAGCAATTCCTCGATGA  | This paper              | N/A                                        |
| Iba-1 mouse rev (RT-qPCR)<br>CAGCATTCGCTTCAAGGACATA  | This paper              | N/A                                        |
| CR3 human fw (RT-qPCR)<br>GCCTTGACCTTATGTCATGGG      | This paper              | N/A                                        |
| CR3 human rev (RT-qPCR)<br>CCTGTGCTGTAGTCGCACT       | This paper              | N/A                                        |
| C3 human fw (RT-qPCR)<br>GGGGAGTCCCATGTA CTCTATC     | This paper              | N/A                                        |
| C3 human rev (RT-qPCR)<br>GGAAGTCGTGGACAGTAACAG      | This paper              | N/A                                        |
| Recombinant DNA                                      |                         |                                            |
| pCMV SPORT6 C3 (human)                               | Open Biosystems/Horizon | Cat# MHS6278-202800305; Clone Id# 40148812 |
| pOTB7 C1QA (human)                                   | Open Biosystems/Horizon | Cat# MHS6278-202832349; Clone Id# 4850418  |
| pOTB7 ENO2 (human)                                   | Open Biosystems/Horizon | Cat# MHS6278-202829522; Clone Id# 3629603  |
| pCMV SPORT 6 C1qa (mouse)                            | Open Biosystems/Horizon | Cat# MMM1013-202704027; Clone Id# 3987436  |

|                                                      |                          |                                                 |
|------------------------------------------------------|--------------------------|-------------------------------------------------|
| pCMV-SPORT6 ENO2 (mouse)                             | Open Biosystems/Horizon  | Cat# MMM1013-202703673; Clone Id# 3711960       |
| pCMV-SPORT6 C3 (mouse)                               | Open Biosystems/Horizon  | Cat# MMM1013-202768722; Clone Id# 5134713       |
| pULTRA EGFP plasmid                                  | Addgene/Horizon          | Cat# 24129                                      |
| RNAscope probes                                      |                          |                                                 |
| RNAscope® Probe- Mm-C3                               | ACD                      | Cat# 417841; Transcript target region 1821-2197 |
| RNAscope® Probe- Mm-Acta2                            | ACD                      | Cat# 319531; Transcript target region 41-1749   |
| RNAscope® 3-plex Positive Control Probe- Mm          | ACD                      | Cat# 320881                                     |
| RNAscope® 3-plex Negative Control Probe              | ACD                      | Cat# 320871                                     |
| Kits                                                 |                          |                                                 |
| Alkaline phosphatase conjugation kit                 | Abcam                    | Cat# ab102850                                   |
| FITC conjugation kit                                 | Abcam                    | Cat# ab102884                                   |
| TSA staining kit                                     | Perkin Elmer             | Cat# NEL0701001KT                               |
| SuperScript First-Strand Synthesis System for RT-PCR | Thermo Fisher Scientific | Cat# 11904018                                   |
| Human Hemoglobin subunit alpha ELISA kit             | Abcam                    | Cat# ab133999                                   |
| Human Complement C3 ELISA kit (for CSF)              | Abcam                    | Cat# ab108823                                   |
| Human Complement C3 ELISA kit (for plasma)           | Abcam                    | Cat# ab108822                                   |
| Human Albumin ELISA kit                              | Abcam                    | Cat# ab108788                                   |
| QuantiChrom Total Protein Assay kit                  | Fisher Scientific        | Cat# QTPR-01K                                   |
| BCA protein assay kit                                | Thermo Fisher Scientific | Cat# 23225                                      |
| RNEasy Mini kit                                      | Quiagen                  | Cat# 74104                                      |
| RNAscope® Target Retrieval Reagents                  | ACD                      | Cat# 322000                                     |
| RNAscope® Fluorescent Multiplex Reagent Kit          | ACD                      | Cat# 320850                                     |
| Viruses                                              |                          |                                                 |
| AAV1/2 h-syn-EGFP                                    | Addgene                  | Cat# 50465; RRID: Addgene 50465                 |

1. Wang, N., *et al.* Neuronal targets for reducing mutant huntingtin expression to ameliorate disease in a mouse model of Huntington's disease. *Nat Med* **20**, 536-541 (2014).
2. Coxon, A., *et al.* A novel role for the beta 2 integrin CD11b/CD18 in neutrophil apoptosis: a homeostatic mechanism in inflammation. *Immunity* **5**, 653-666 (1996).
3. Ebihara, T., Kawabata, I., Usui, S., Sobue, K. & Okabe, S. Synchronized formation and remodeling of postsynaptic densities: long-term visualization of hippocampal neurons expressing postsynaptic density proteins tagged with green fluorescent protein. *J Neurosci* **23**, 2170-2181 (2003).
