# Supplementary material for: Microglia and complement mediate early corticostriatal synapse loss and cognitive dysfunction in Huntington’s disease
Source: Nat Med. 2023 Oct 9;29(11):2866–84. doi: 10.1038/s41591-023-02566-3 (PMC10667107; doi:10.1038/s41591-023-02566-3)
Supplement: Supplementary file 14 — Source data for graphs and statistical analysis associated with Extended Data Fig. 2 and full-length, unprocessed blots associated with the immunoblot data presented in Extended Data Fig. 2c,g,l. [file 41591_2023_2566_MOESM14_ESM.pdf]

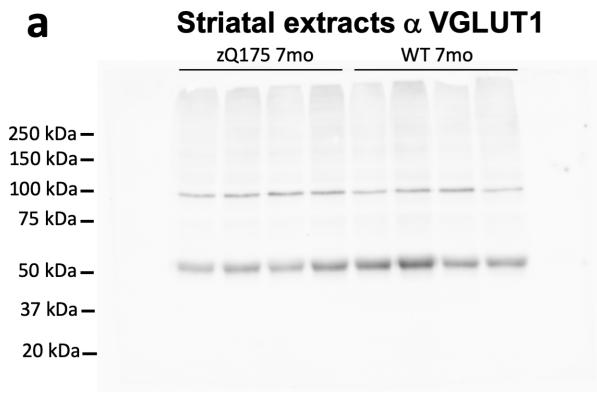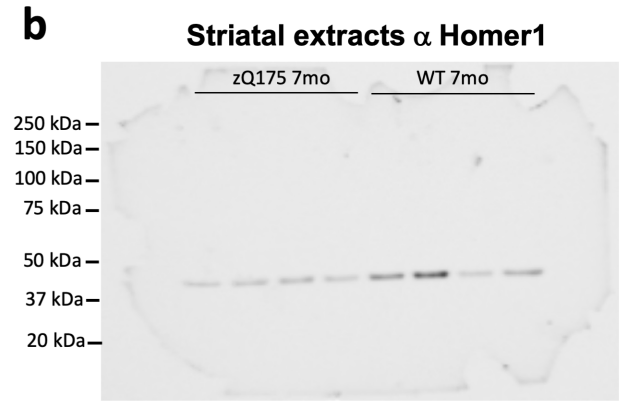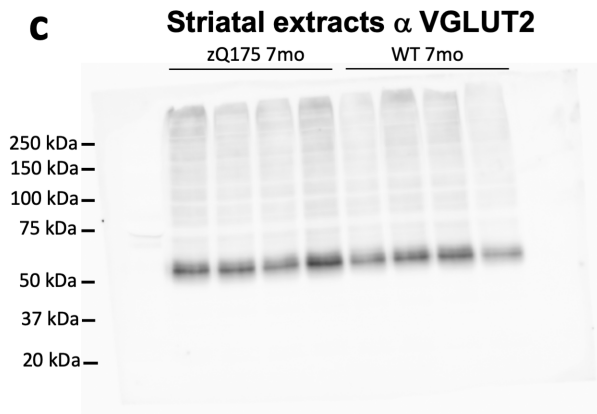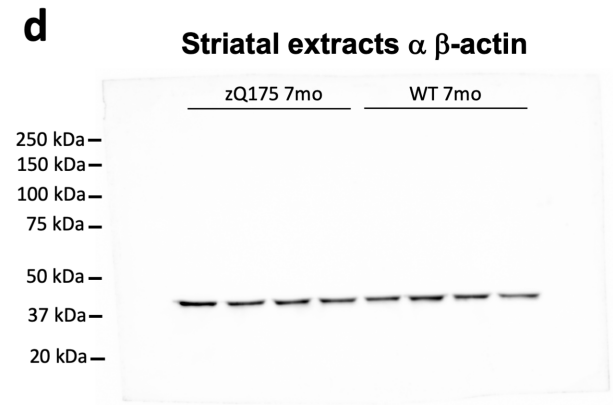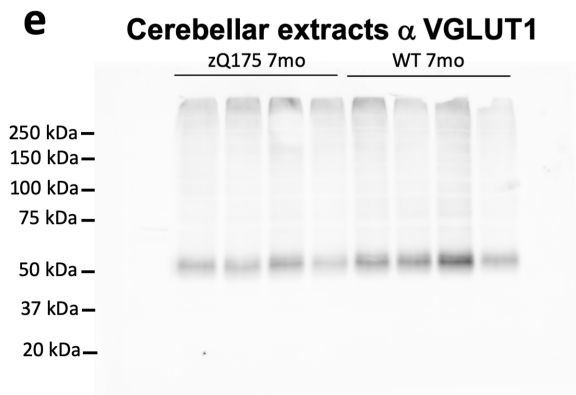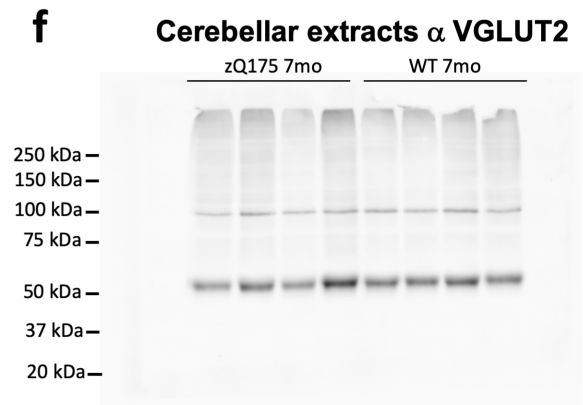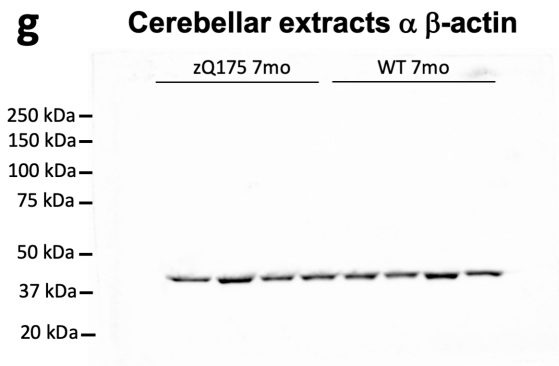

**Source data figure 11** (a) Full length lanes of the chemiluminescent anti VGLUT1 (~55kDa) signal displayed in Extended data figure 1c; approximate molecular weights, estimated with Precision Plus Protein Kaleidoscope prestained protein standards (BIO-RAD), are shown to the left. (b) Full length lanes of the chemiluminescent anti Homer1 (~39kDa) signal displayed in Extended data figure 1c; approximate molecular weights, estimated with Precision Plus Protein Kaleidoscope prestained protein standards (BIO-RAD), are shown to the left. (c) Full length lanes of the chemiluminescent anti VGLUT2 (~56kDa) signal displayed in Extended data figure 1c; approximate molecular weights, estimated with Precision Plus Protein Kaleidoscope prestained protein standards (BIO-RAD), are shown to the left. (d) Full length lanes of the chemiluminescent anti  $\beta$ -actin (~42kDa) signal displayed in Extended data figure 1c; approximate molecular weights, estimated with Precision Plus Protein Kaleidoscope prestained protein standards (BIO-RAD), are shown to the left. (e) Full length lanes of the chemiluminescent anti VGLUT1 (~55kDa) signal displayed in Extended data figure 1g; approximate molecular weights, estimated with Precision Plus Protein Kaleidoscope prestained protein standards (BIO-RAD), are shown to the left. (f) Full length lanes of the chemiluminescent anti VGLUT2 (~56kDa) signal displayed in Extended data figure 1g; approximate molecular weights, estimated with Precision Plus Protein Kaleidoscope prestained protein standards (BIO-RAD), are shown to the left. (g) Full length lanes of the chemiluminescent anti  $\beta$ -actin (~42kDa) signal displayed in Extended data figure 1g; approximate molecular weights, estimated with Precision Plus Protein Kaleidoscope prestained protein standards (BIO-RAD), are shown to the left.

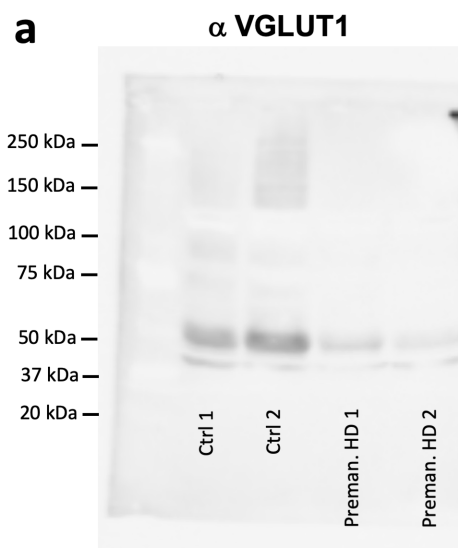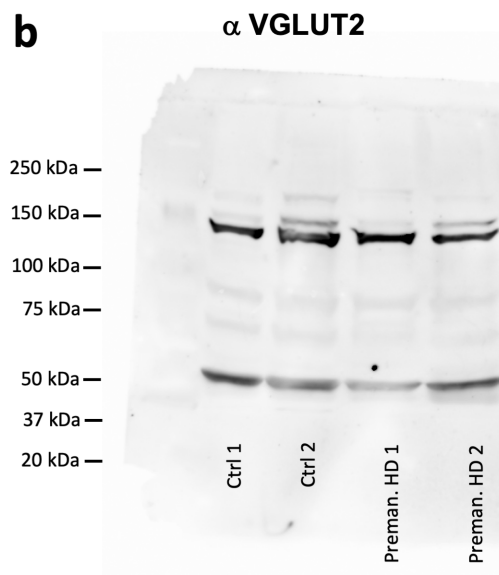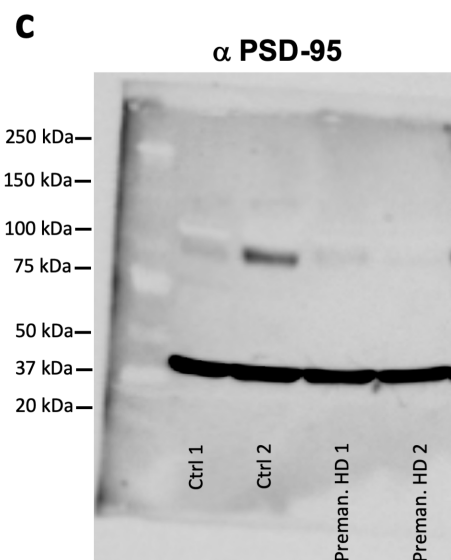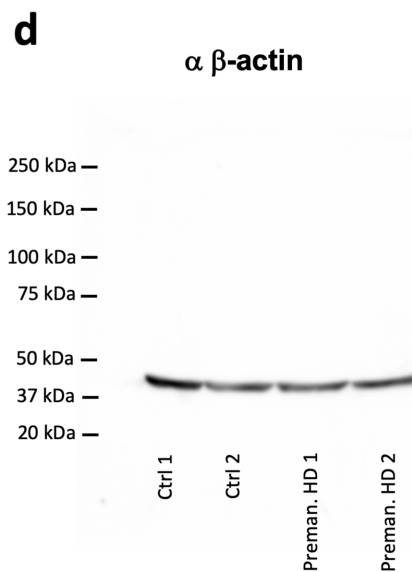

**Source data figure 12** (a) Full length lanes of the chemiluminescent anti VGLUT1 (~55kDa) signal displayed in Extended data figure 1I; approximate molecular weights, estimated with Precision Plus Protein Kaleidoscope prestained protein standards (BIO-RAD), are shown to the left. (b) Full length lanes of the chemiluminescent anti VGLUT2 (~56kDa) signal displayed in Extended data figure 1I; approximate molecular weights, estimated with Precision Plus Protein Kaleidoscope prestained protein standards (BIO-RAD), are shown to the left. (c) Full length lanes of the chemiluminescent anti PSD-95 (~95kDa) signal displayed in Extended data figure 1I; approximate molecular weights, estimated with Precision Plus Protein Kaleidoscope prestained protein standards (BIO-RAD), are shown to the left. (d) Full length lanes of the chemiluminescent anti  $\beta$ -actin (~42kDa) signal displayed in Extended data figure 1I; approximate molecular weights, estimated with Precision Plus Protein Kaleidoscope prestained protein standards (BIO-RAD), are shown to the left. Please note that for all blots additional lanes to the right of Preman.HD 2, which contained extracts from a different source and which were run to address questions for an alternate project, have been cropped for clarity. Abbreviations: Preman. = Premanifest. Ctrl = Control
